# Supplementary material for: A highly selective and biocompatible chemosensor for sensitive detection of zinc(ii)
Source: Royal Society of Chemistry journal article supplement (doi:10.1039/c5nj02723c), 2015-11-25
Supplement: c5nj02723c1.pdf [file c5nj02723c1.pdf]

**Electronic Supplementary Information (ESI) for New Journal of Chemistry**

**A highly selective and biocompatible chemosensor for sensitive detection of zinc(II)**

**Sudipto Dey<sup>a</sup>, Ankita Roy<sup>a</sup>, Guru Prasad Maiti<sup>b</sup>, Sushil Kumar Mandal<sup>c</sup>, Piyali Banerjee<sup>a</sup>  
and Partha Roy<sup>\*,a</sup>**

<sup>a</sup> Department of Chemistry, Jadavpur University, Jadavpur, Kolkata-700 032, India.

E-mail: [proy@chemistry.jdvu.ac.in](mailto:proy@chemistry.jdvu.ac.in); Tel: +91-3324572970; Fax: +91-3324146414.

<sup>b</sup> Department of Molecular Biology and Biotechnology, University of Kalyani, Kalyani-741235, West Bengal, India.

<sup>c</sup> Department of Ecological Engineering & Environmental Management, University of Kalyani, Kalyani, Nadia-741235, West Bengal, India.

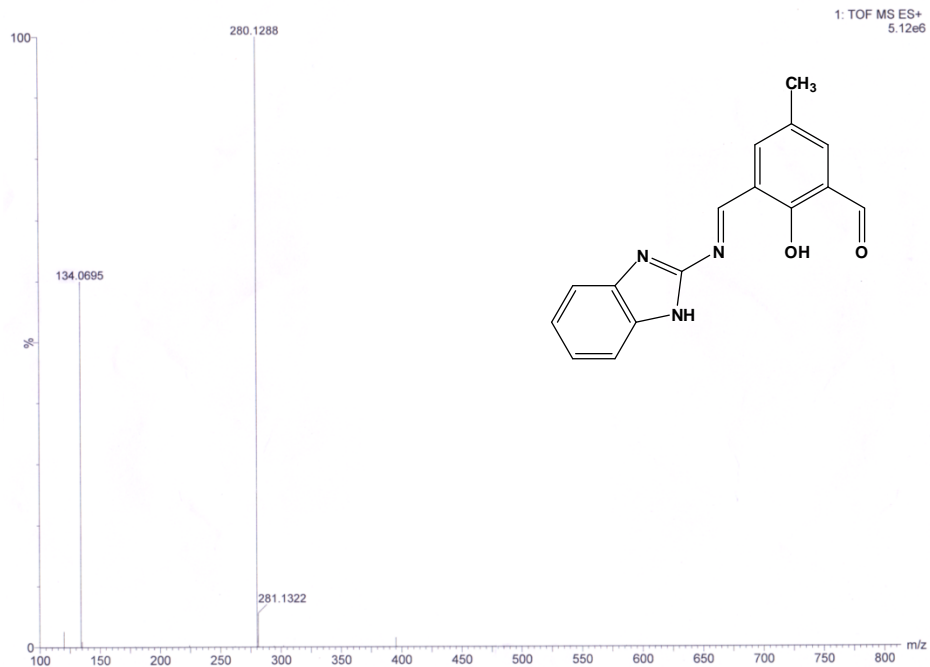

Fig. s1: Mass spectrum of HL<sup>1</sup> in methanol

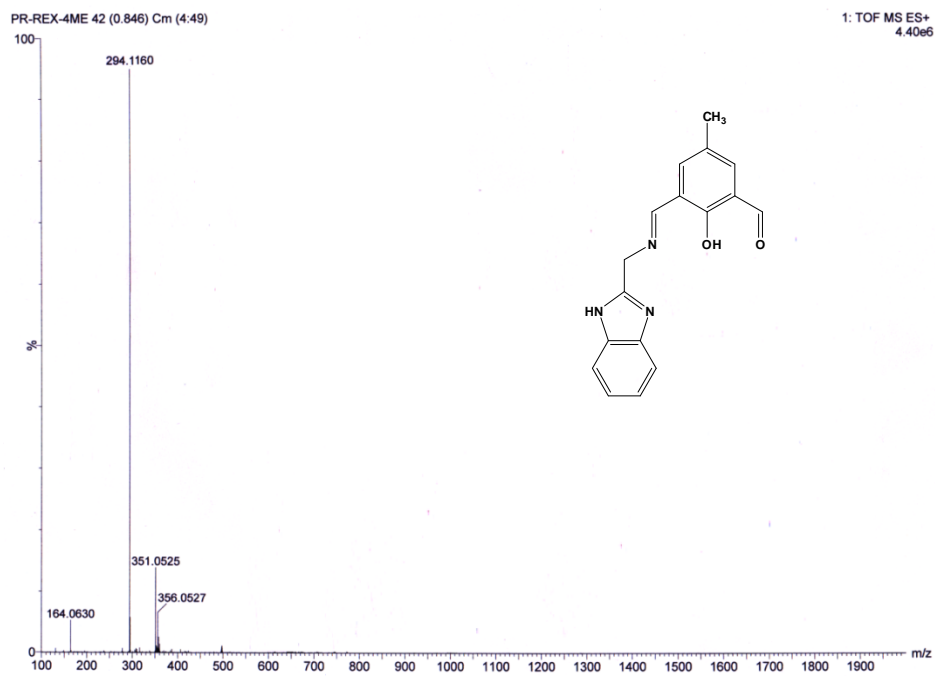

Fig. s2: Mass spectrum of HL<sup>2</sup> in methanol

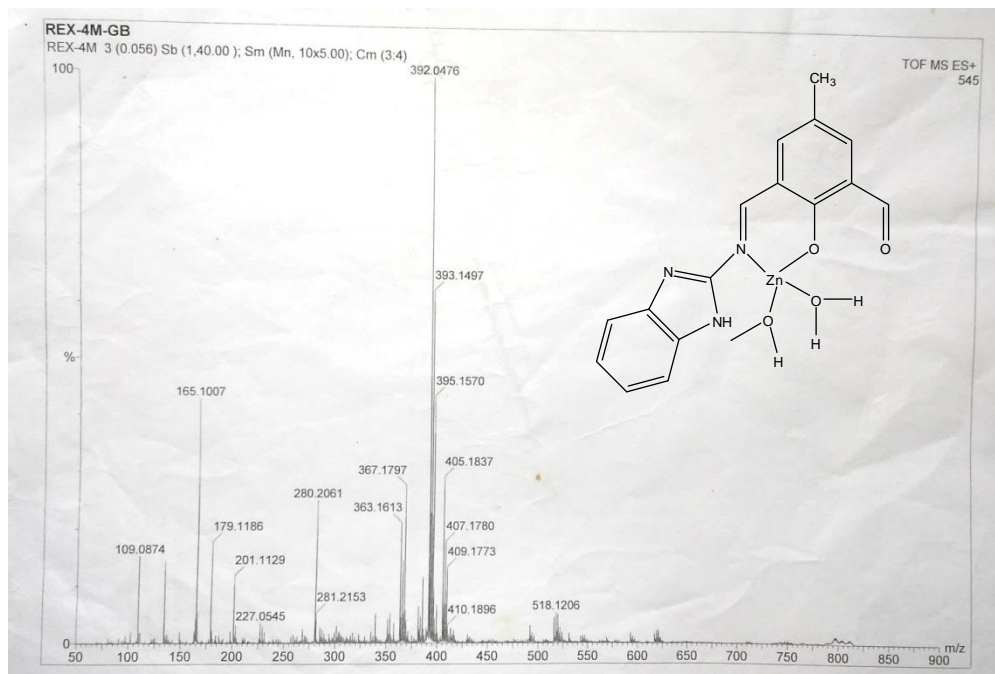

Fig. s3: Mass spectrum of HL<sup>1</sup> with Zn<sup>2+</sup> in 1:1 ratio (Complex 1) in methanol

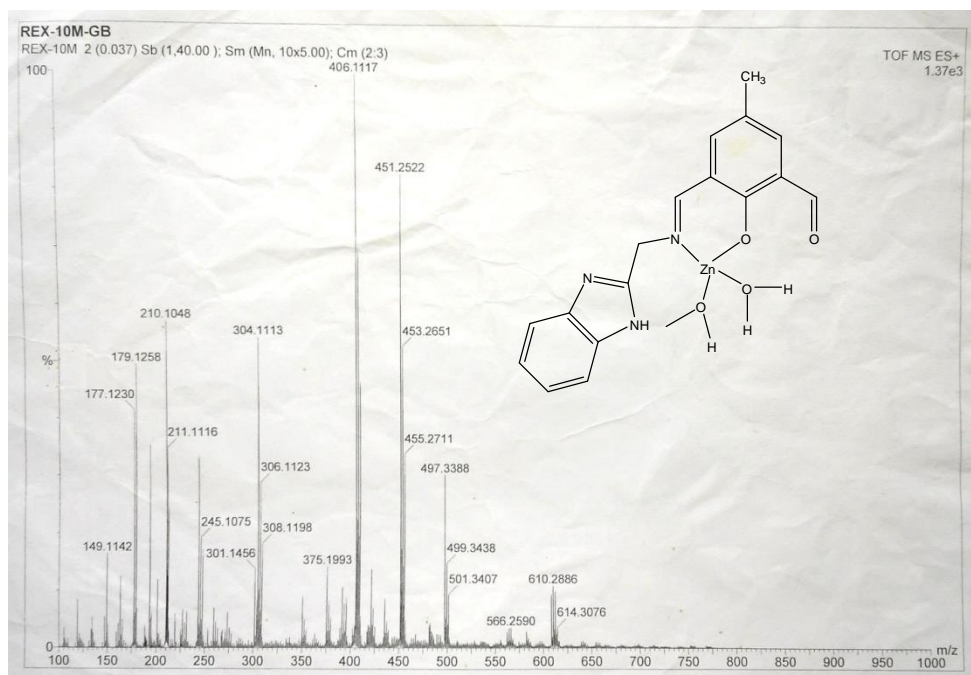

Fig. s4: Mass spectrum of HL<sup>2</sup> with Zn<sup>2+</sup> in 1:1 ratio (Complex 2) in methanol

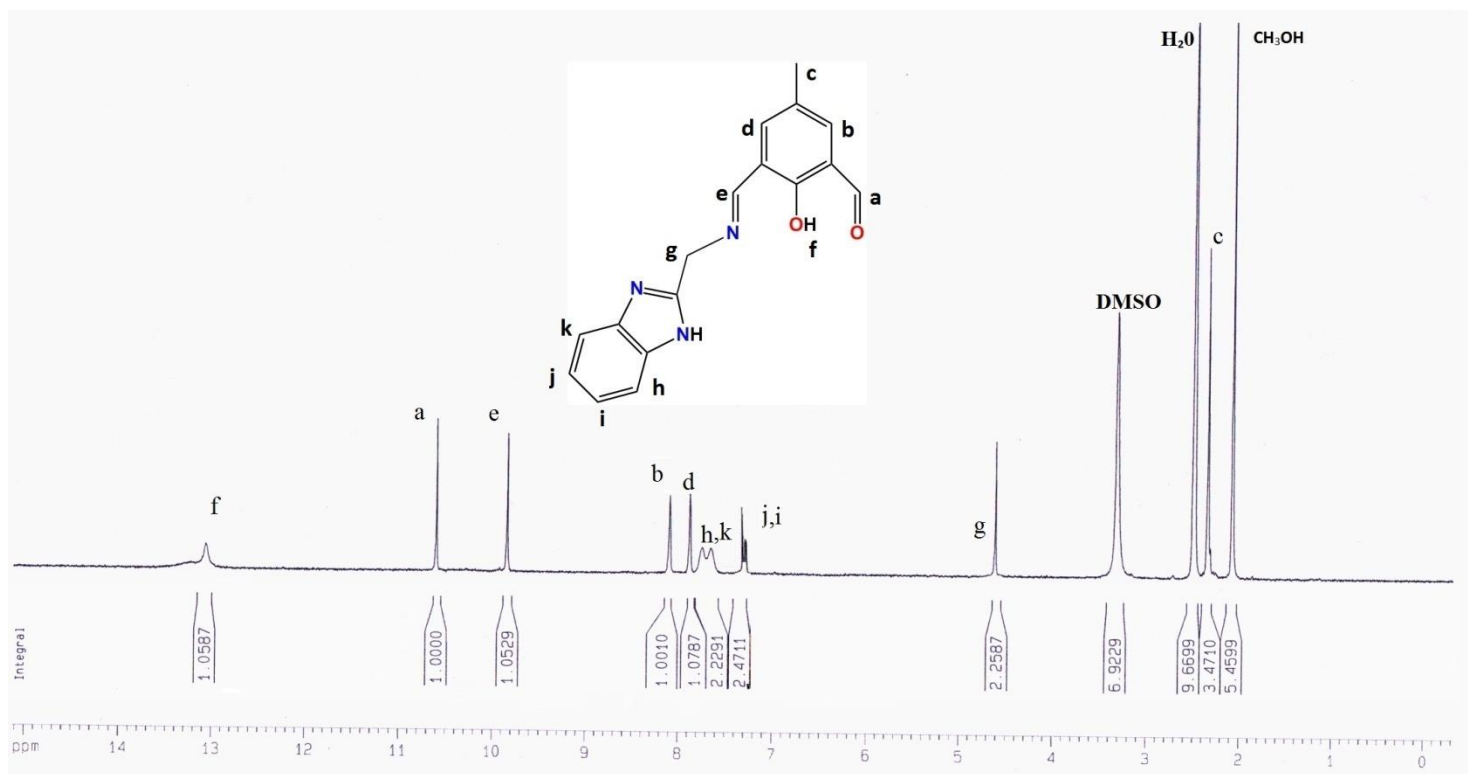

Fig. s5: <sup>1</sup>H NMR spectrum of HL<sup>2</sup> in DMSO-d<sub>6</sub>.

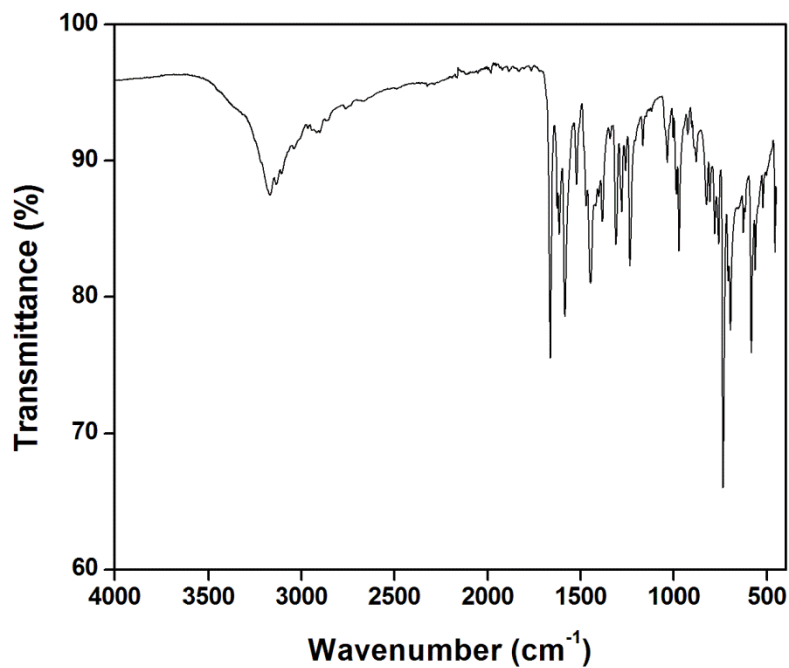

Fig. s6: FT-IR spectrum of HL<sup>1</sup>

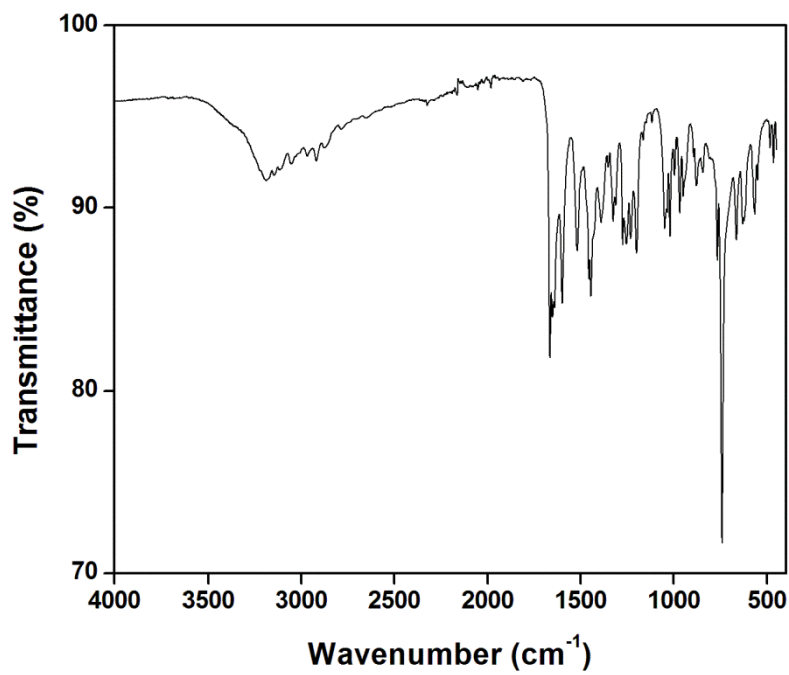

Fig. s7: FT-IR spectrum of HL<sup>2</sup>

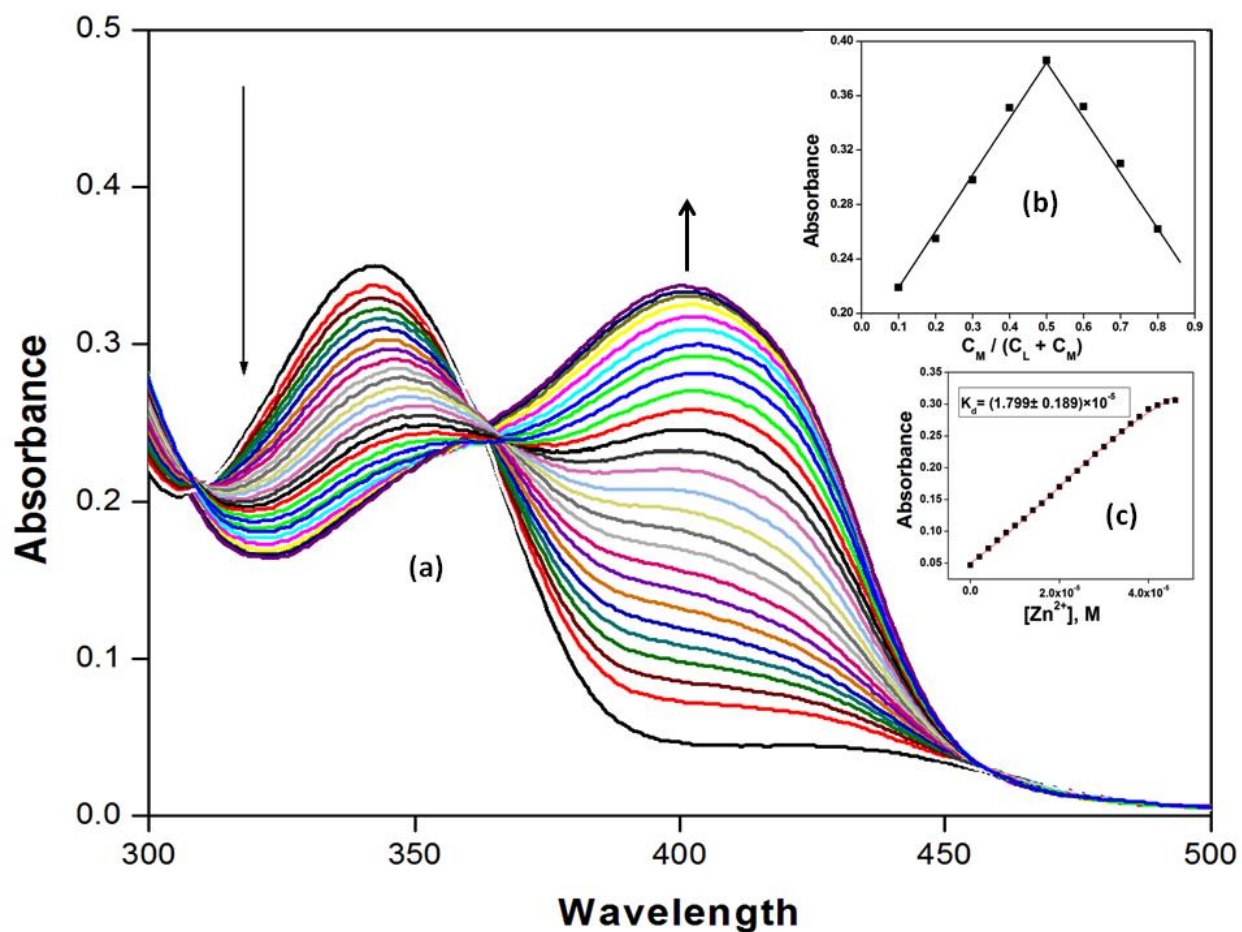

Fig. s8: (a) Absorption spectra of HL<sup>2</sup> (40 µM) with the gradual addition of Zn<sup>2+</sup> ion (0-40 µM) in 10 mM HEPES buffer in water:methanol (1:9, v/v) (pH = 7.2) at room temperature; (b) Job's plot indicating 1:1 complex formation and (c) Plot of absorption at 398 nm vs. concentration of Zn<sup>2+</sup>.

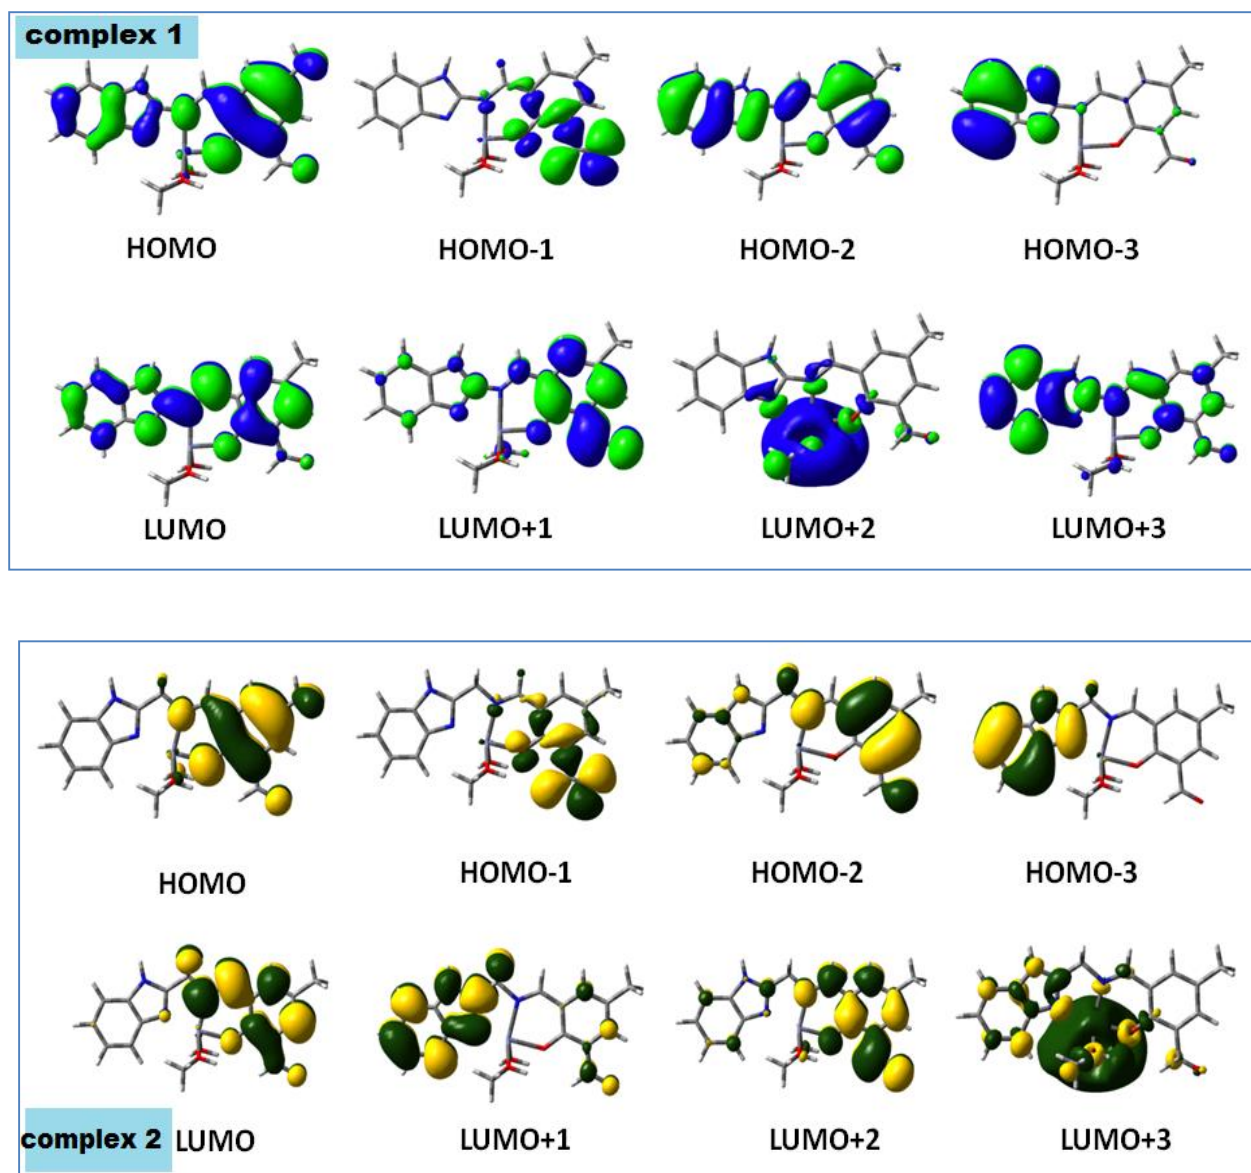

Fig. s9: Contour plots of some selected frontier molecular orbitals of complex 1 and complex 2 at their optimized  $S_0$  geometry.

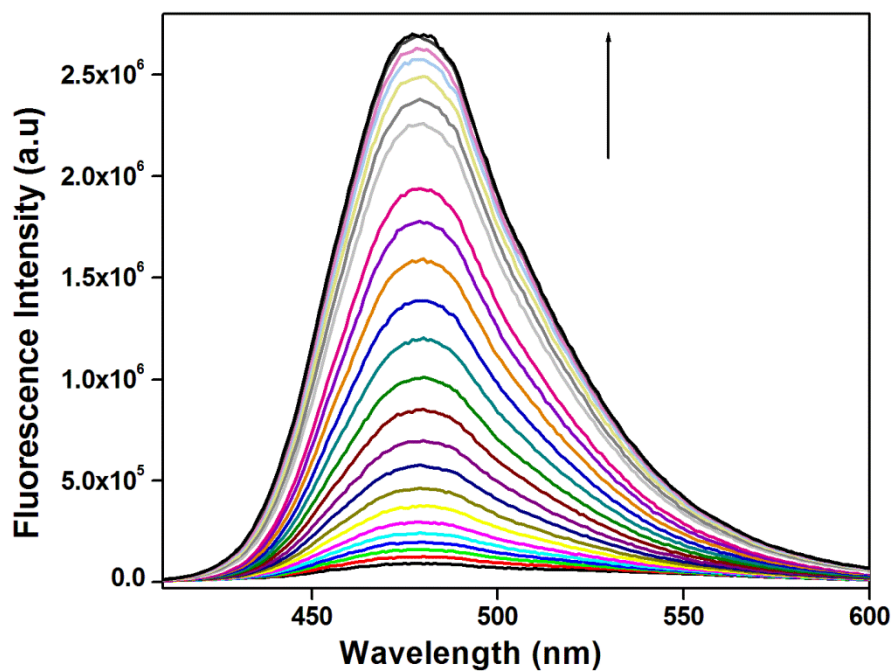

Fig. s10: Fluorescence intensity of HL<sup>2</sup> (40  $\mu$ M) in the presence of 0, 4, 8, 12, 16, 20, 24, 28, 32, 36, 40 and 44  $\mu$ M of Zn<sup>2+</sup> ion in 10 mM HEPES buffer in water:methanol (1:9, v/v) (pH = 7.2) at room temperature (excitation: 398 nm)

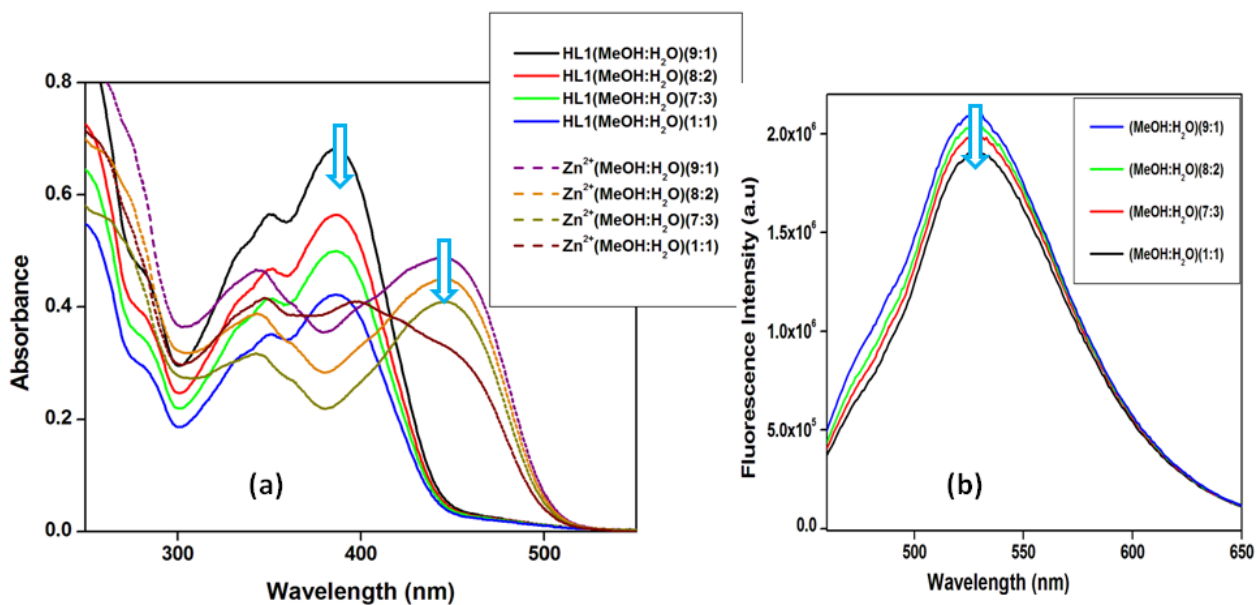

Fig. s11: UV-vis and fluorescence spectra of HL<sup>1</sup> in different water/methanol ratio.



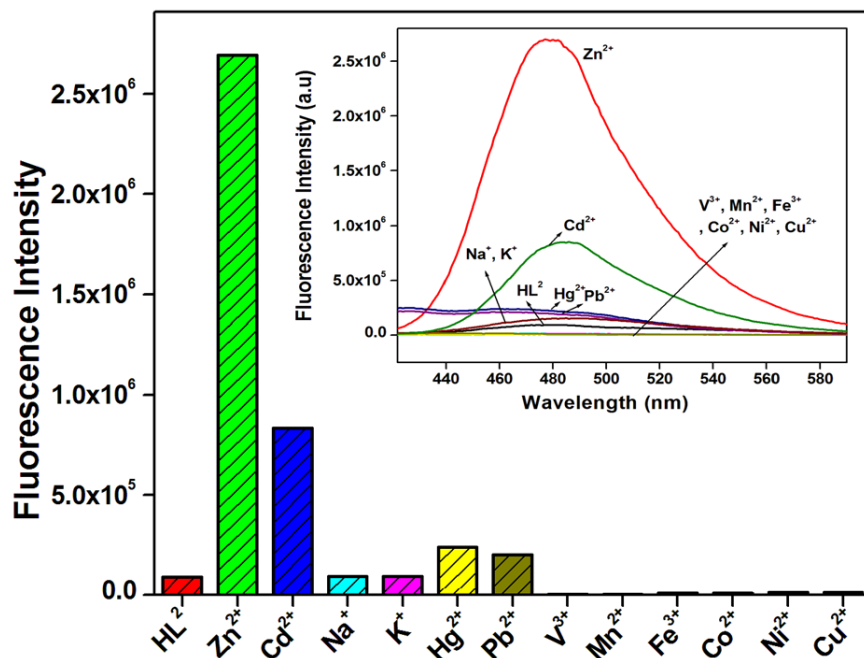

Fig. s12: Fluorescence intensity of HL<sup>2</sup> (40 µM) in the presence of different metal ions (200 µM) in 10 mM HEPES buffer in water:methanol (1:9, v/v) (pH = 7.2) at room temperature (excitation: 398 nm)

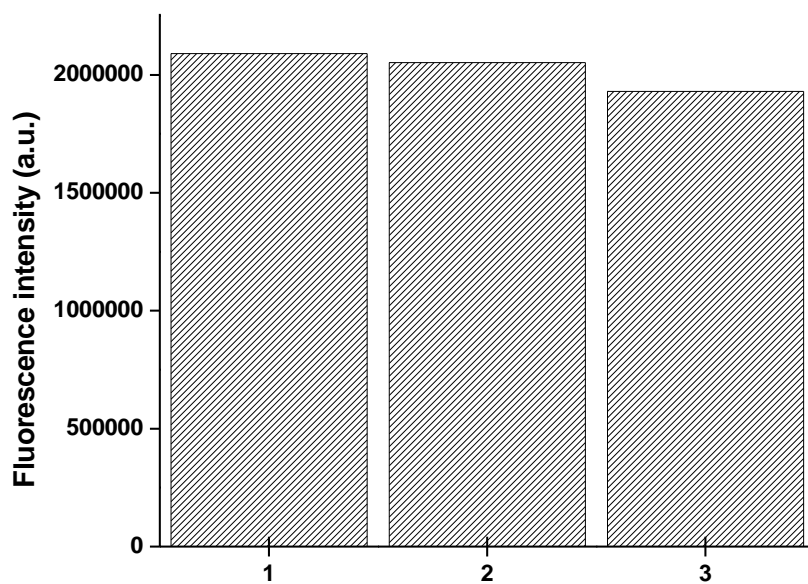

Fig. s13: Fluorescence intensity of HL<sup>1</sup> (40 µM) in the presence of (1) nitrate, (2) perchlorate and (3) chloride salt of Zn<sup>2+</sup> (40 µM) in 10 mM HEPES buffer in water:methanol (1:9, v/v) (pH = 7.2) at room temperature (excitation: 445 nm)

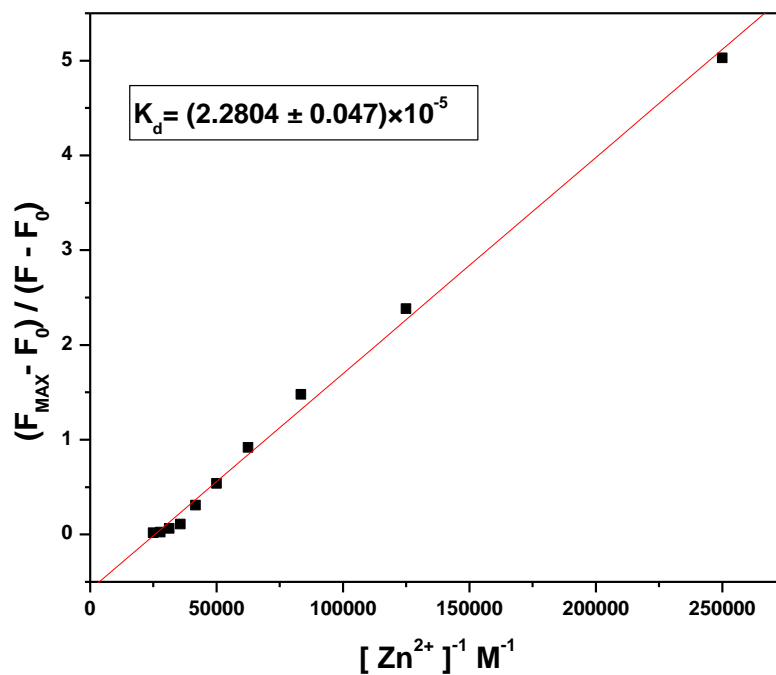

Fig. s14: A plot of  $(F_{\max}-F_0)/(F-F_0)$  vs  $1/[Zn^{2+}]$  following Benesi-Hildebrand equation. The binding constant  $K$  was determined from the slop to be  $4.38 (\pm 0.09) \times 10^4 M^{-1}$ .

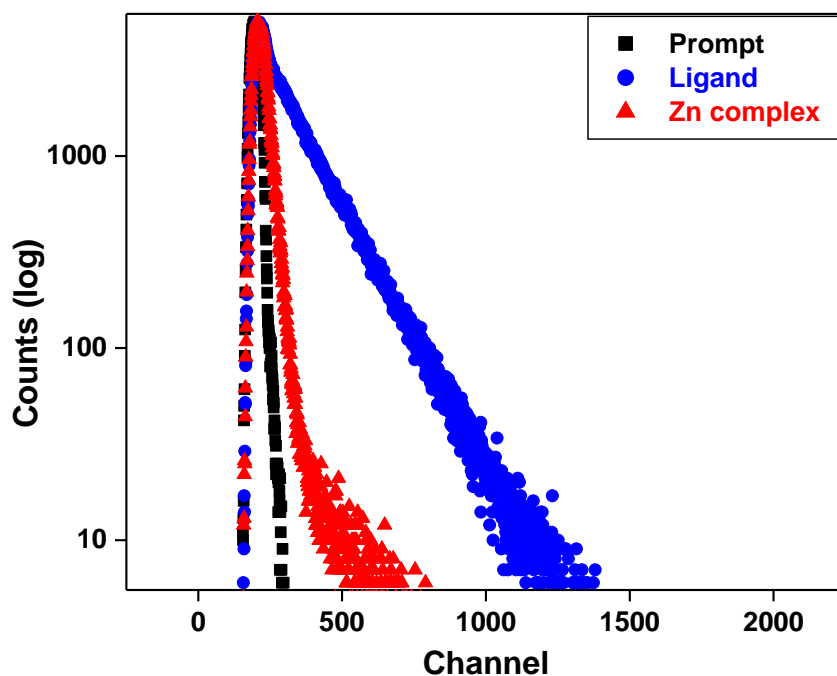

Fig. s15: Excited state fluorescence decay of  $HL^1$  (red) and its zinc complex (blue)

### Calculation of the detection limit(LOD) for HL<sup>1</sup>:

The detection limit DL of HL<sup>1</sup> for Zn<sup>2+</sup> was determined from 3σ method by following equation:  $DL = K \cdot Sb1/S$

Where K = 2 or 3 (we take 3 in this case); Sb1 is the standard deviation of the blank solution; S is the slope of the calibration curve obtained from Linear dynamic plot of F.I. vs [Zn<sup>2+</sup>].

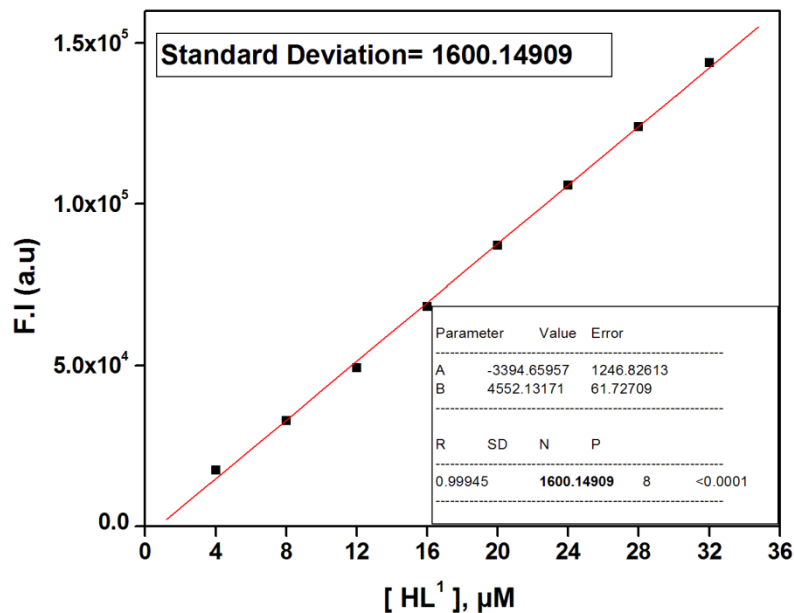

Fig. s16: Determination of Sb1 of the blank, HL<sup>1</sup> solution.

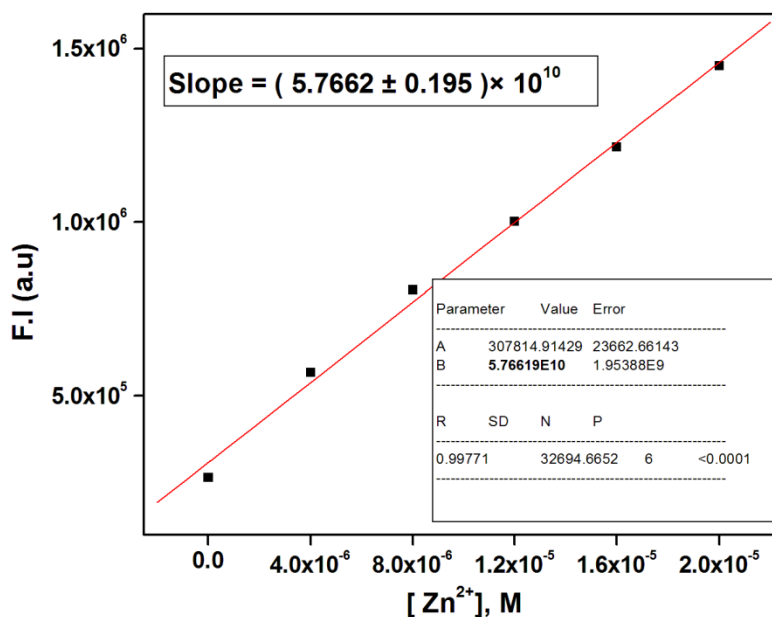

Fig. s17: Linear dynamic plot of F.I. (at 528 nm) vs. [Zn<sup>2+</sup>] for the determination of S (slope); HL<sup>1</sup> =40 µM

$$LOD (Zn^{2+}) = (3 \times 1600.149)/5.76619 \times 10^{10} = 0.832 \text{ nM}$$

### Calculation of the detection limit(LOD) for HL<sup>2</sup>:

The detection limit (DL) of HL<sup>2</sup> for Zn<sup>2+</sup> ion was determined from 3σ method by following equation: **DL = K\* Sb1/S**

Where K = 2 or 3 (we take 3 in this case); Sb1 is the standard deviation of the blank solution; S is the slope of the calibration curve obtained from Linear dynamic plot of F.I. vs [Zn<sup>2+</sup>].

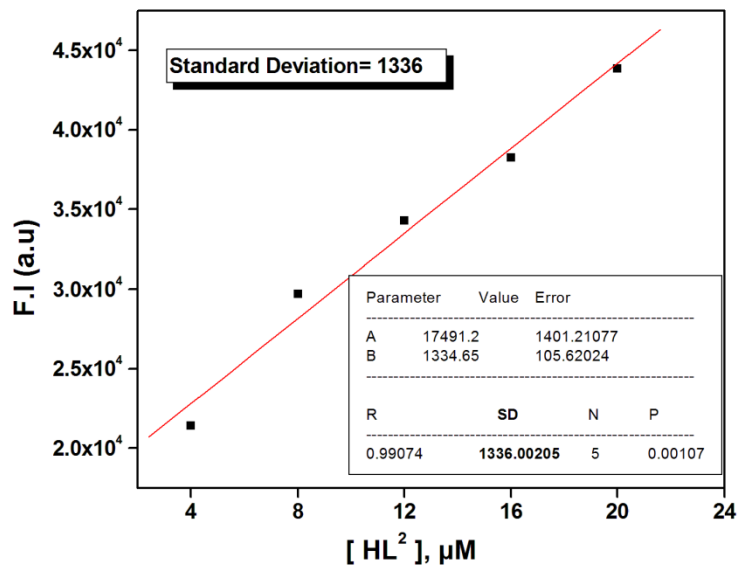

Fig. s18: Determination of Sb1 of the blank and HL<sup>2</sup> solution.

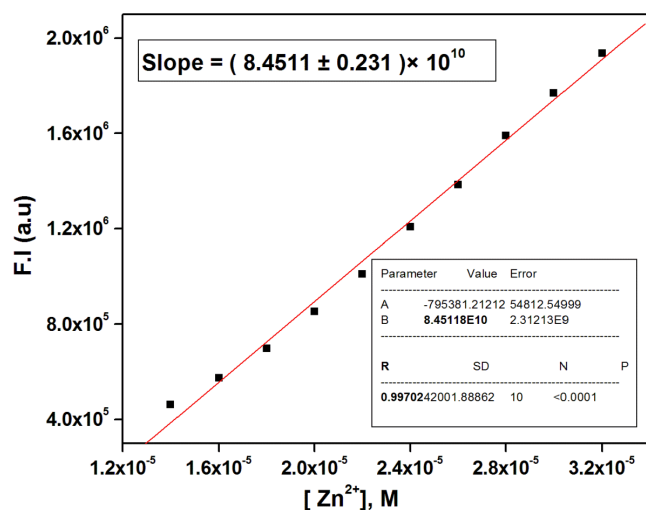

Fig. s19: Linear dynamic plot of FI (at 480 nm) vs. [Zn<sup>2+</sup>] for the determination of S (slope); HL<sup>2</sup> =40 µM

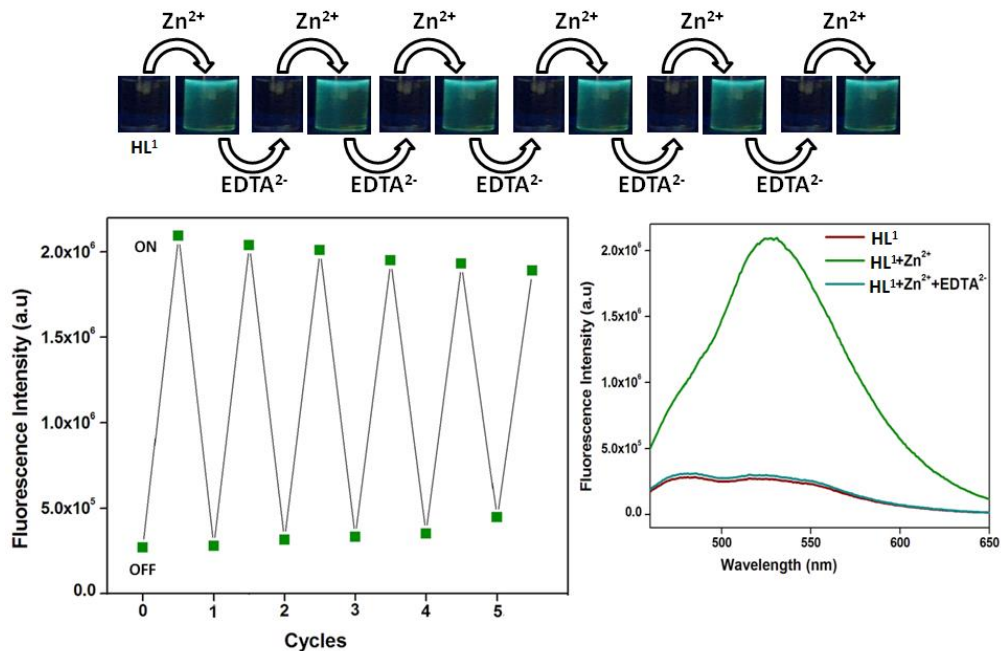

Fig. s20: Fluorescence reversibility of HL<sup>1</sup> in the presence of one eqv. of EDTA and one eqv. of Zn<sup>2+</sup>.

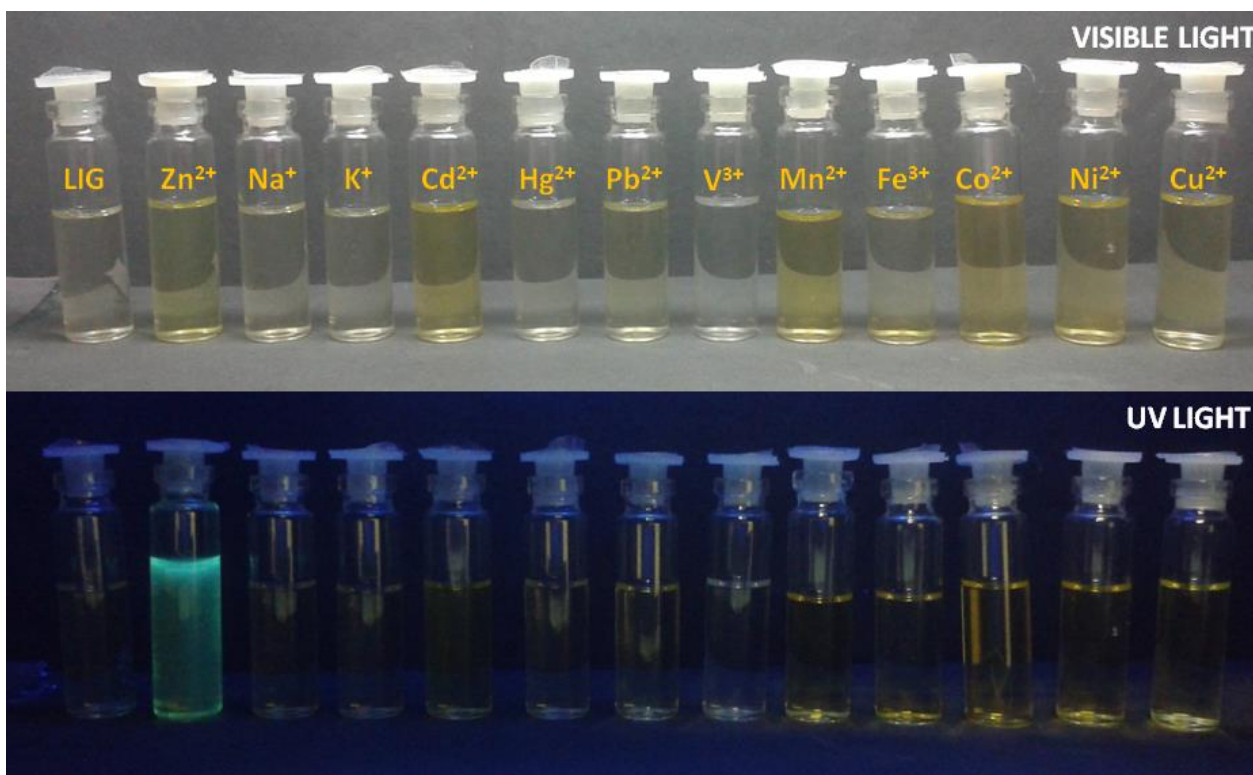

Fig. s21: Image of change in color of HL<sup>1</sup> in the presence of different metal ions in visible light and under UV radiation in 10 mM HEPES buffer in water:methanol (1:9, v/v) (pH = 7.2).

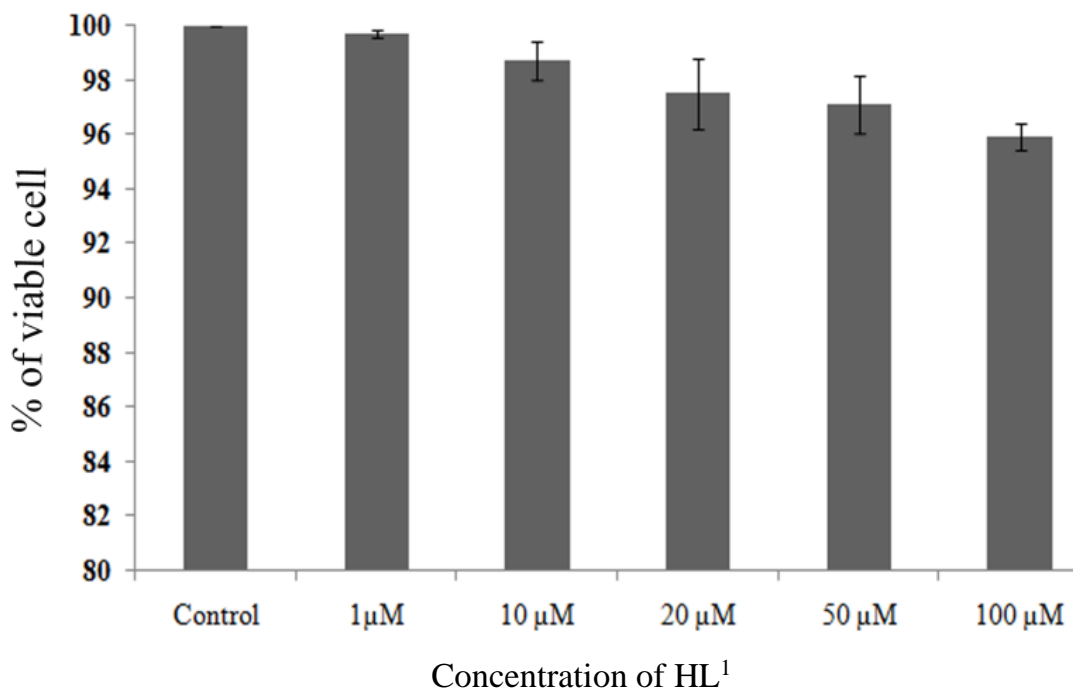

Fig. s22: % cell viability of A549 cells treated with different concentrations (1 μM-100 μM) of HL<sup>1</sup> for 6 h determined by MTT assay. Results are expressed as mean ± S.D. of three independent experiments.

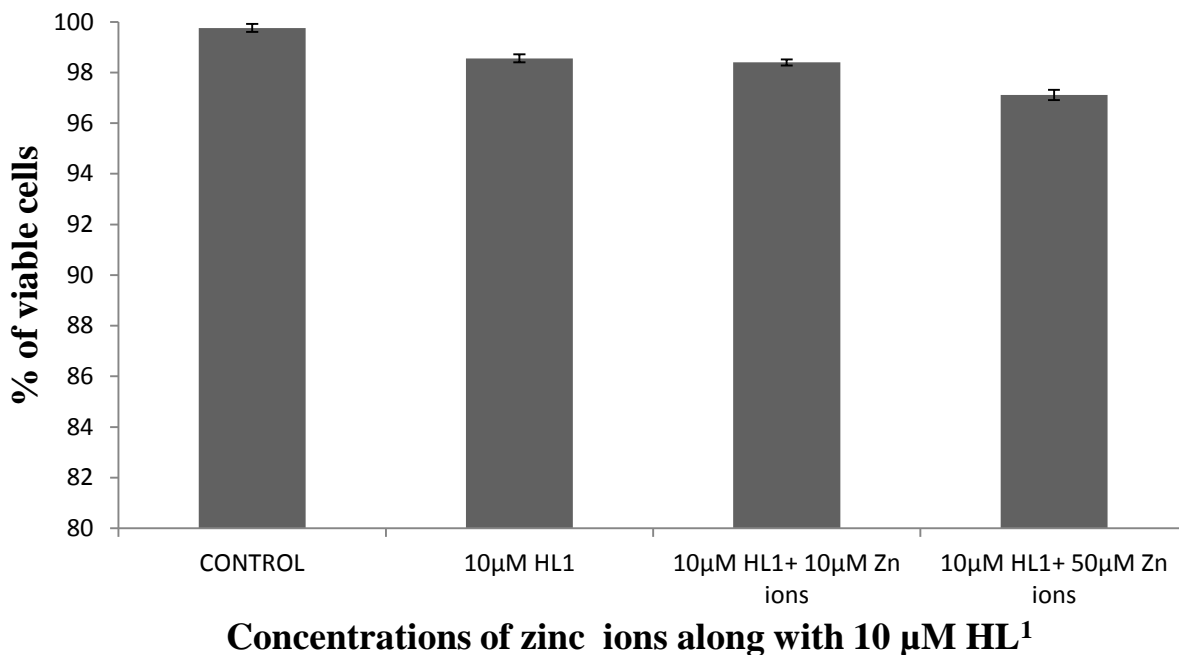

Fig. s23: % cell viability of A549 cells treated with fixed concentration (10 μM) of HL<sup>1</sup> along with different concentrations of zinc ions (10 μM and 50 μM) for 6 h determined by MTT assay. Results are expressed as mean ± S.D. of three independent experiments.

Table s1: Selected optimized geometrical parameters for Complex 1 and Complex 2 in the ground state ( $S_0$ ) calculated at B3LYP Levels.

| Complex 1         |       |                 |        |
|-------------------|-------|-----------------|--------|
| Bond Distance (Å) |       | Bond Angles (°) |        |
| C27–O24           | 1.476 | N10–Zn22–O24    | 125.7  |
| C3–O21            | 1.326 | N10–Zn22–O21    | 85.95  |
| C8–N10            | 1.312 | N10–Zn22–O23    | 124.37 |
| H28–O24           | 0.975 | O23–Zn22–O21    | 88.52  |
| N10–Zn22          | 2.086 | O24–Zn22–O21    | 93.60  |
| O24–Zn22          | 2.043 | O23–Zn22–N10    | 109.87 |
| O23–Zn22          | 2.055 |                 |        |
| O21–Zn22          | 2.001 |                 |        |
| Complex 2         |       |                 |        |
| Bond Distance (Å) |       | Bond Angles (°) |        |
| C28–O25           | 1.467 | C28–O25         | 1.467  |
| C8–N10            | 1.312 | C8–N10          | 1.312  |
| C3–O22            | 1.333 | C3–O22          | 1.333  |
| H29–O25           | 0.978 | H29–O25         | 0.978  |
| N10–Zn23          | 2.091 | N10–Zn23        | 2.091  |
| O24–Zn23          | 2.082 | O24–Zn23        | 2.082  |
| O22–Zn23          | 2.028 | O22–Zn23        | 2.028  |
| O25–Zn23          | 2.074 | O25–Zn23        | 2.074  |

**Table s2:** Main calculated optical transition for Complexes 1 and 2 with vertical excitation energies ( $E_{\text{cal}}$ ), oscillator strengths ( $f_{\text{cal}}$ ) of the lowest few excited singlets obtained from TDDFT/B3LYP/CPCM method in methanol.

|                  | Excitation (eV) | Electronic transition State     | excitation (nm) | Osc. strength (f) | Key transitions     | CI     |
|------------------|-----------------|---------------------------------|-----------------|-------------------|---------------------|--------|
| <b>Complex 1</b> | 2.8055          | S <sub>0</sub> -S <sub>1</sub>  | 442             | 0.5670            | (82%)HOMO →LUMO     | 0.6436 |
|                  | 3.2554          | S <sub>0</sub> -S <sub>2</sub>  | 382             | 0.4672            | (03%)HOMO →LUMO+1   | 0.1183 |
|                  |                 |                                 |                 |                   | (86%)HOMO-1 →LUMO   | 0.6543 |
|                  | 3.5772          | S <sub>0</sub> -S <sub>3</sub>  | 347             | 0.3208            | (11%)HOMO-2 →LUMO   | 0.2394 |
|                  |                 |                                 |                 |                   | (77%)HOMO-1 →LUMO+2 | 0.6221 |
|                  | 5.0305          | S <sub>0</sub> -S <sub>12</sub> | 247             | 0.0810            | (05%)HOMO-2 →LUMO+4 | 0.1518 |
|                  |                 |                                 |                 |                   | (02%)HOMO-1 →LUMO+4 | 0.1012 |
|                  |                 |                                 |                 |                   | (83%)HOMO →LUMO+2   | 0.6451 |
|                  |                 |                                 |                 |                   |                     |        |
|                  |                 |                                 |                 |                   |                     |        |
| <b>Complex 2</b> | 3.2444          | S <sub>0</sub> -S <sub>1</sub>  | 398             | 0.2246            | (03%)HOMO-1 →LUMO+1 | 0.1192 |
|                  |                 |                                 |                 |                   | (85%)HOMO →LUMO     | 0.6516 |
|                  | 3.852           | S <sub>0</sub> -S <sub>2</sub>  | 346             | 0.0072            | (10%)HOMO-3 →LUMO   | 0.2185 |
|                  |                 |                                 |                 |                   | (02%)HOMO-3 →LUMO+1 | 0.1038 |
|                  |                 |                                 |                 |                   | (63%)HOMO-2 →LUMO   | 0.5606 |
|                  |                 |                                 |                 |                   | (14%)HOMO-2 →LUMO+1 | 0.2665 |
|                  | 4.523           | S <sub>0</sub> -S <sub>8</sub>  | 274             | 0.0032            | (65%)HOMO-5 →LUMO   | 0.5705 |
|                  |                 |                                 |                 |                   | (03%)HOMO-5 →LUMO+1 | 0.1314 |
|                  |                 |                                 |                 |                   | (03%)HOMO-3 →LUMO+1 | 0.1363 |
|                  |                 |                                 |                 |                   | (25%)HOMO-2 →LUMO+1 | 0.3553 |
